# Supplementary material for: An enhanced fluorescent ZIF-8 film by capturing guest molecules for light-emitting applications
Source: Royal Society of Chemistry journal article supplement (doi:10.1039/d1tc00457c), 2021-01-01
Supplement: d1tc00457c1.pdf [file d1tc00457c1.pdf]

## **The supporting information**

### **An enhanced fluorescent ZIF-8 film by capturing guest molecules for light-emitting applications**

Qiufen Liu <sup>a</sup>, Shouqin Tian <sup>a,\*</sup>, Xiujian Zhao <sup>a</sup>, Gopinathan Sankar <sup>b</sup>

<sup>a</sup> State Key Laboratory of Silicate Materials for Architectures, Wuhan University of Technology

(WUT), No. 122, Luoshi Road, Wuhan 430070, P. R. China

<sup>b</sup> Department of Chemistry, Materials Chemistry Centre, University College London, 20 Gordon

St., London WC1H 0AJ, UK

\*Corresponding author. Tel.: +86-027-87652553; Fax: +86-027-87883743.

E-mail address: tiansq@whut.edu.cn (S. Tian)

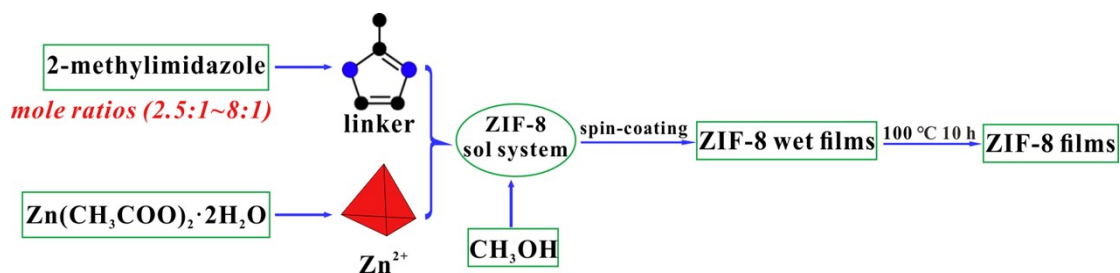

Figure S1. Experimental scheme for preparation of ZIF-8 films at different mole ratios of reactants.

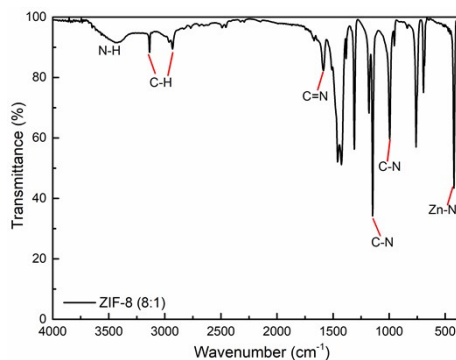

Figure S2. FTIR spectrum of the ZIF-8 film synthesized with the mole ratio of 8:1.

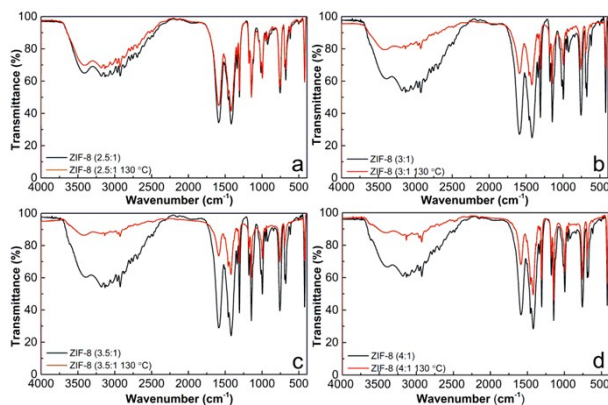

Figure S3. FTIR spectra of ZIF-8 films synthesized with low mole ratio before (black lines) and after (red lines) heat treatment.

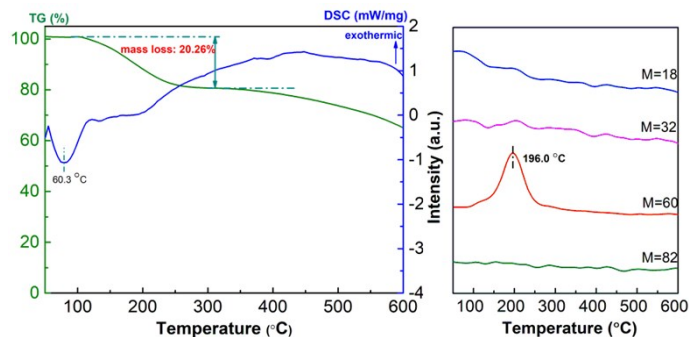

Figure S4. Thermo-gravimetric curve and traced guest molecules curves of the ZIF-8 film (2.5:1) in Ar.

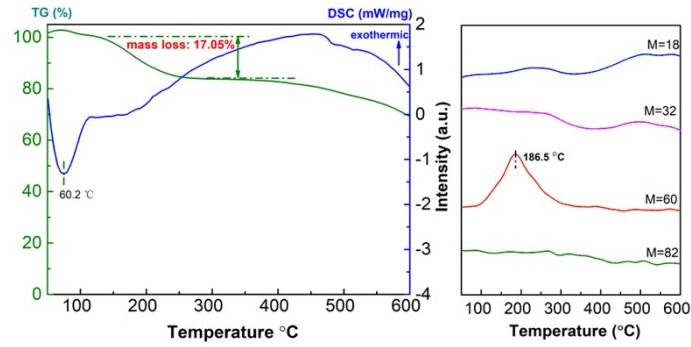

Figure S5. Thermo-gravimetric curve and traced guest molecules curves of the ZIF-8 film (3:1) in Ar.

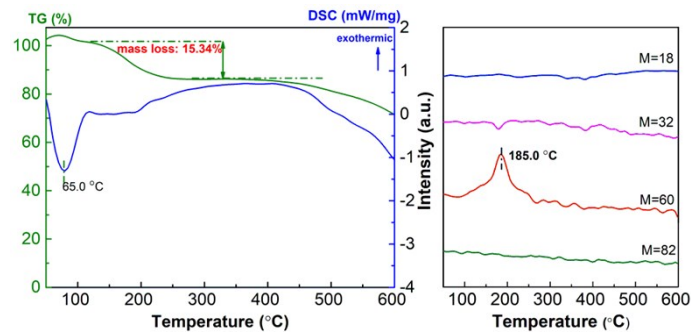

Figure S6. Thermo-gravimetric curve and traced guest molecules curves of the ZIF-8 film (3.5:1) in Ar.

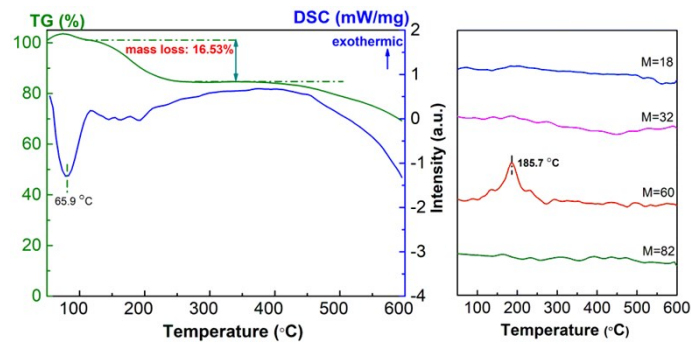

Figure S7. Thermo-gravimetric curve and traced guest molecules curves of the ZIF-8 film (4:1) in Ar.

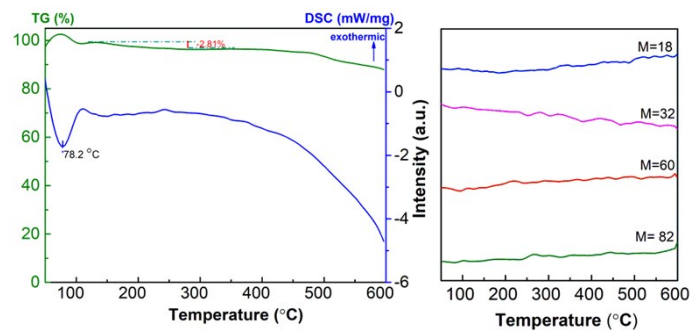

Figure S8. Thermo-gravimetric curve and traced guest molecules curves of the ZIF-8 film (5:1) in N<sub>2</sub>.

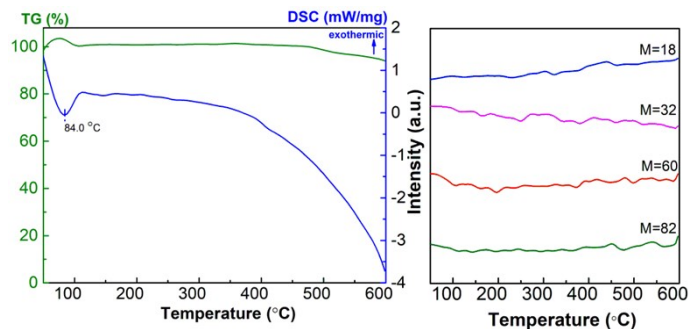

Figure S9. Thermo-gravimetric curve and traced guest molecules curves of the ZIF-8 film (6:1) in  $N_2$ .

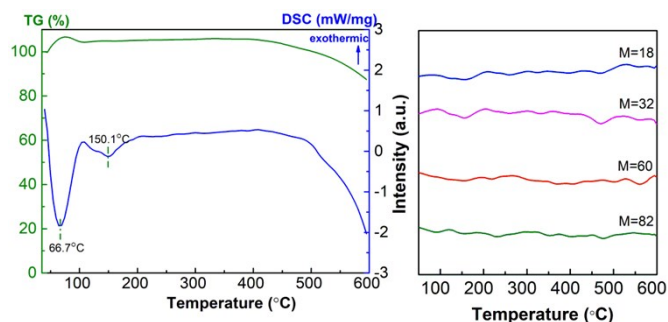

Figure S10. Thermo-gravimetric curve and traced guest molecules curves of the ZIF-8 film (8:1) in Ar.

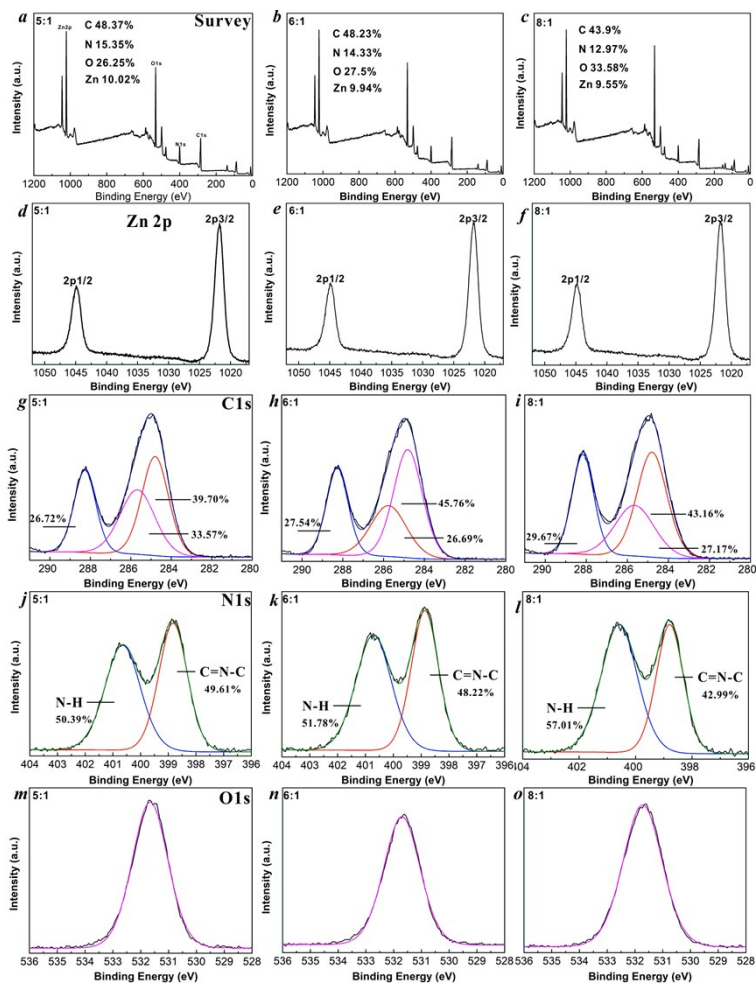

Figure S11. XPS survey spectra (a-c), high resolution Zn2p spectra (d-f), C1s spectra (g-i), N1s spectra (j-l) and O1s spectra (m-o) of ZIF-8 films synthesized with the mole ratio ratios of 5:1, 6:1 and 8:1.

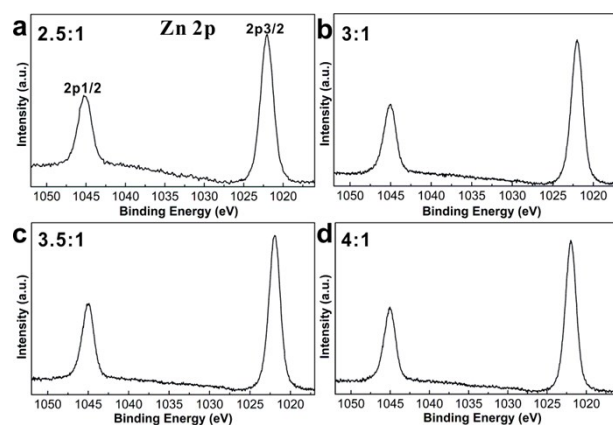

**Figure S12.** XPS high resolution Zn2p spectra of ZIF-8 films synthesized with different mole ratios, (a) 2.5:1, (b) 3:1, (c) 3.5:1 and (d) 4:1.

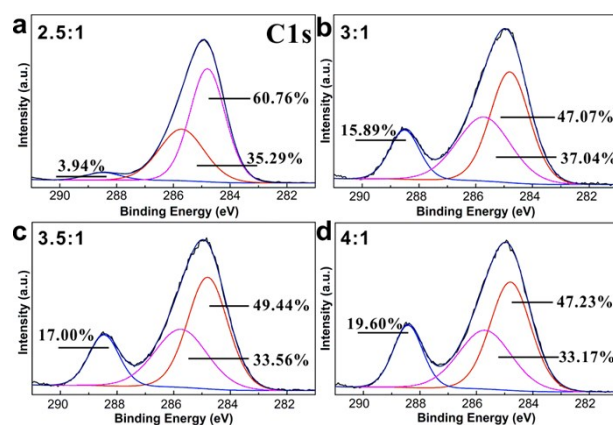

**Figure S13.** XPS high resolution C1s spectra of ZIF-8 films synthesized with different mole ratios, (a) 2.5:1, (b) 3:1, (c) 3.5:1 and (d) 4:1.

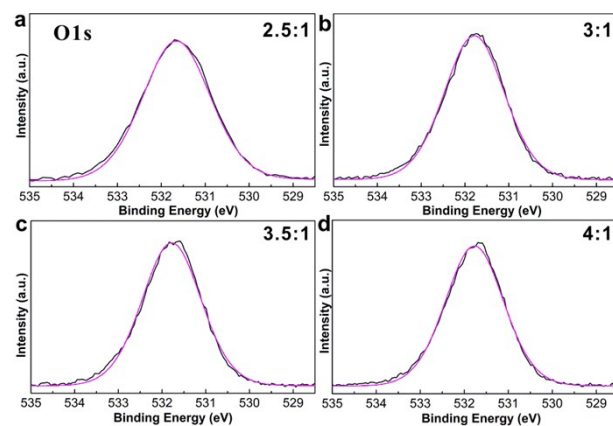

**Figure S14.** XPS high resolution O1s spectra of ZIF-8 films synthesized with different mole ratios, (a) 2.5:1, (b) 3:1, (c) 3.5:1 and (d) 4:1.

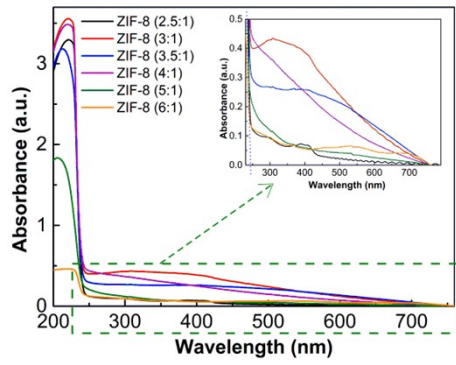

Figure S15. UV-vis absorption spectra of ZIF-8 films obtained through different mole ratios.

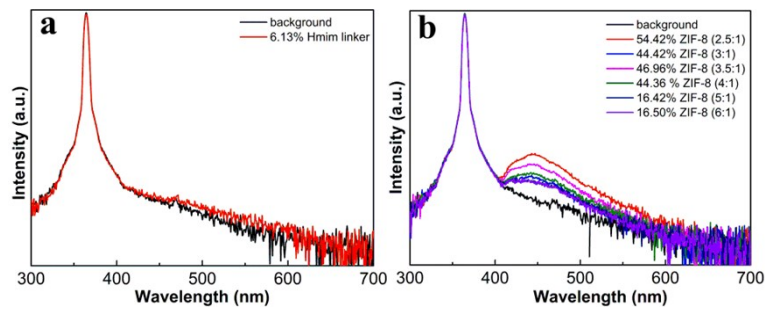

Figure S16. PLQY spectra of Hmim powders (a) and ZIF-8 films synthesized with different mole ratios (b). ( $\lambda_{\text{ex}}=365 \text{ nm}$ )

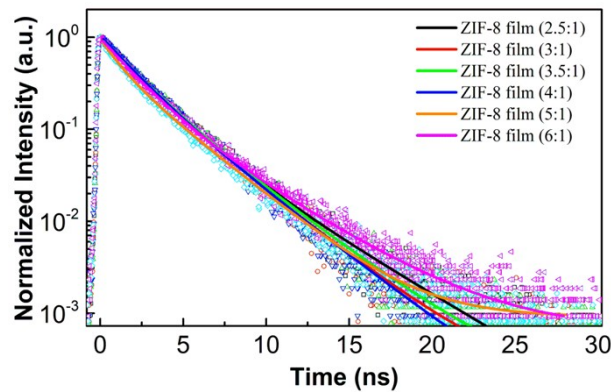

Figure S17. Fluorescence lifetime decay curves for ZIF-8 films synthesized with different mole ratios.

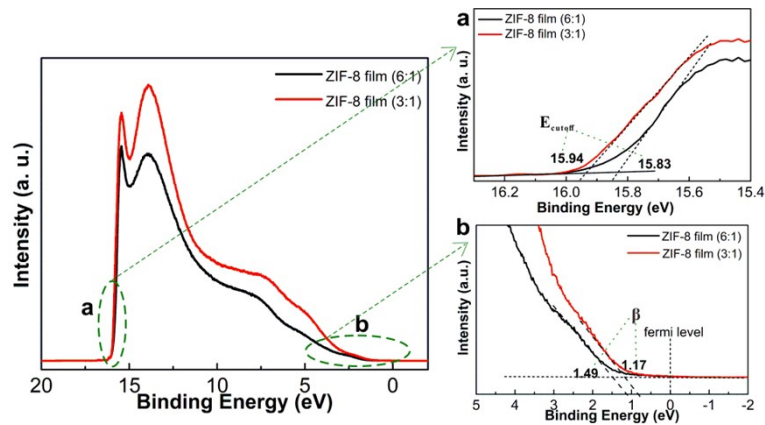

Figure S18. UPS patterns of ZIF-8 films synthesized with mole ratios of 6:1 and 3:1. (note:  $WF=hn-E_{\text{cutoff}}-E_F$ ,  $HOMO=WF+\beta$ ,  $hn=21.2 \text{ eV}$ ,  $WF$ : work function,  $E_{\text{cutoff}}$ : low kinetic energy cutoff edge,  $E_F$ : fermi level.)

**Table S1** The infrared absorption characteristic peaks of ZIF-8 samples synthesized with the mole ratios of 8:1.

| Wavenumber (cm <sup>-1</sup> ) | The vibrations of the functional groups | Wavenumber (cm <sup>-1</sup> ) | The vibrations of the functional groups |
|--------------------------------|-----------------------------------------|--------------------------------|-----------------------------------------|
| ~3134                          | C-H in the imidazole ring               | ~2927                          | C-H in methyl group                     |
| ~1585                          | C=N stretch modes                       | 1350-1500                      | entire ring stretching                  |
| 900-1350                       | in-plane bending of the ring            | ~1146, ~995                    | C-N stretching                          |
| below 800                      | out-of-plane bending of the ring        | ~421                           | Zn-N stretching                         |

**Table S2** Photoluminescence quantum yield ZIF-8 films synthesized with different mole ratios and Hmim powder using 365 nm excitation wavelength.

| Mole ratio | PLQY (%) | Mole ratio | PLQY (%) |
|------------|----------|------------|----------|
| 8:1        | 4.03     | 3.5:1      | 46.96    |
| 6:1        | 16.50    | 3:1        | 44.42    |
| 5:1        | 16.42    | 2.5:1      | 54.42    |
| 4:1        | 44.36    | Hmim       | 6.13     |

**Table S3** Results of fitting parameters of the PL lifetime decay measured for the ZIF-8 films at different mole ratios at 440 nm ( $\lambda_{\text{ex}}=365$  nm).

| Samples (mole ratios) | $\tau_1$ / ns | $A_1$ / % | $\tau_2$ / ns | $A_2$ / % | $\tau_{\text{avg}}$ / ns |
|-----------------------|---------------|-----------|---------------|-----------|--------------------------|
| 2.5:1                 | 2.1           | 82.12%    | 4.2           | 17.88%    | 2.74                     |
| 3:1                   | 1.9           | 58.65%    | 3.2           | 41.35%    | 2.61                     |
| 3.5:1                 | 1.9           | 61.02%    | 3.4           | 38.98%    | 2.70                     |
| 4:1                   | 1.8           | 55.12%    | 3.2           | 44.88%    | 2.63                     |
| 5:1                   | 1.1           | 44.68%    | 3.0           | 55.32%    | 2.57                     |
| 6:1                   | 1.7           | 66.46%    | 3.8           | 33.54%    | 2.81                     |

$$\text{note: } \tau_{\text{avg}} = (A_1 \times \tau_1^2 + A_2 \times \tau_2^2) / (A_1 \times \tau_1 + A_2 \times \tau_2)$$
